# Supplementary material for: Leveraging TROPOMI observations and WRF-GHG modeling to improve methane emission assessments in India
Source: Copernicus journal article supplement (doi:10.5194/egusphere-2025-1977), 2025-06-05
Supplement: Supplementary file 1 [file egusphere-2025-1977-supplement.pdf]

## Supplementary Material

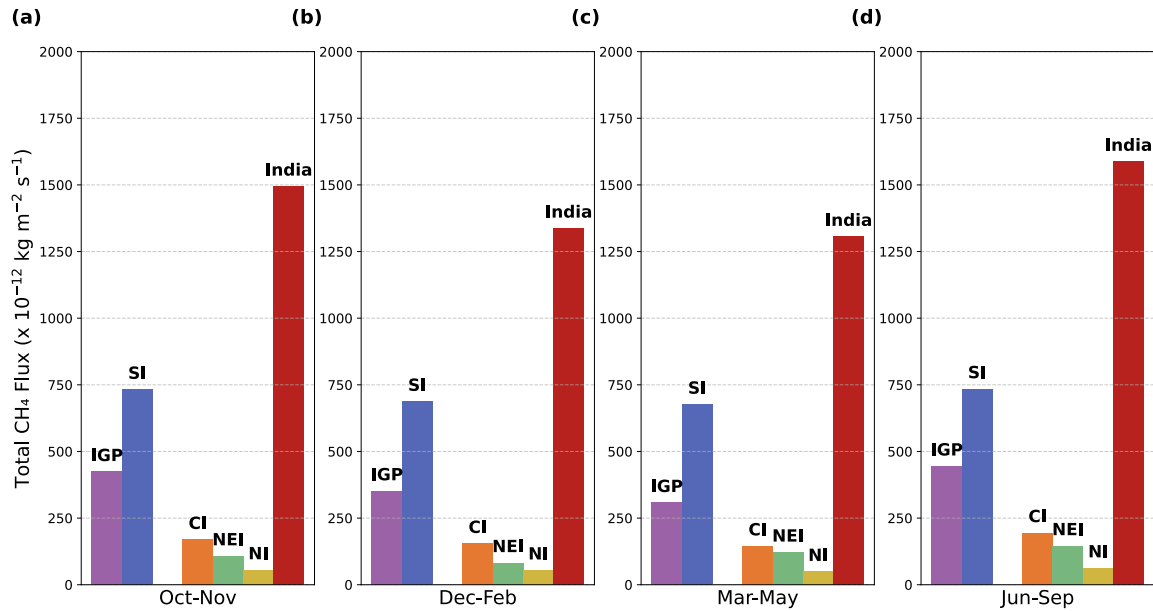

**Figure S1.** Total of wetland, biomass burning and anthropogenic seasonal fluxes from bottom-up inventory data.

**Table S1.** The observed and modeled monthly mean XCH<sub>4</sub> and their difference (in ppb) over the entire study domain for 2018 and 2019.

| 2018     |                          |                      |                       |
|----------|--------------------------|----------------------|-----------------------|
| Month    | Tropomi (Mean ± Std Dev) | WRF (Mean ± Std Dev) | Diff (Mean ± Std Dev) |
| January  | 1840.13 ± 36.65          | 1853.17 ± 34.51      | -13.03 ± 28.47        |
| February | 1840.36 ± 36.06          | 1867.55 ± 39.89      | -27.19 ± 36.68        |
| March    | 1843.38 ± 32.54          | 1847.02 ± 49.70      | -3.64 ± 40.90         |
| April    | 1842.35 ± 29.73          | 1845.95 ± 36.25      | -3.60 ± 35.33         |
| May      | 1845.25 ± 29.71          | 1842.90 ± 25.10      | 2.35 ± 27.08          |
| October  | 1870.58 ± 36.64          | 1819.10 ± 62.17      | 51.48 ± 64.00         |
| November | 1862.90 ± 31.60          | 1883.23 ± 41.55      | -20.33 ± 29.53        |
| 2019     |                          |                      |                       |
| Month    | Tropomi (Mean ± Std Dev) | WRF (Mean ± Std Dev) | Diff (Mean ± Std Dev) |
| January  | 1847.95 ± 36.20          | 1876.88 ± 31.89      | -28.93 ± 24.07        |
| February | 1848.04 ± 35.55          | 1864.56 ± 39.45      | -16.53 ± 41.86        |
| March    | 1851.30 ± 29.22          | 1858.26 ± 43.92      | -6.96 ± 43.19         |
| April    | 1849.99 ± 29.41          | 1850.17 ± 46.89      | -0.18 ± 43.62         |
| May      | 1852.43 ± 27.48          | 1857.51 ± 20.12      | -5.08 ± 24.73         |
| October  | 1883.78 ± 37.68          | 1862.82 ± 54.45      | 20.97 ± 46.29         |
| November | 1876.14 ± 31.91          | 1873.91 ± 52.02      | 2.23 ± 46.68          |

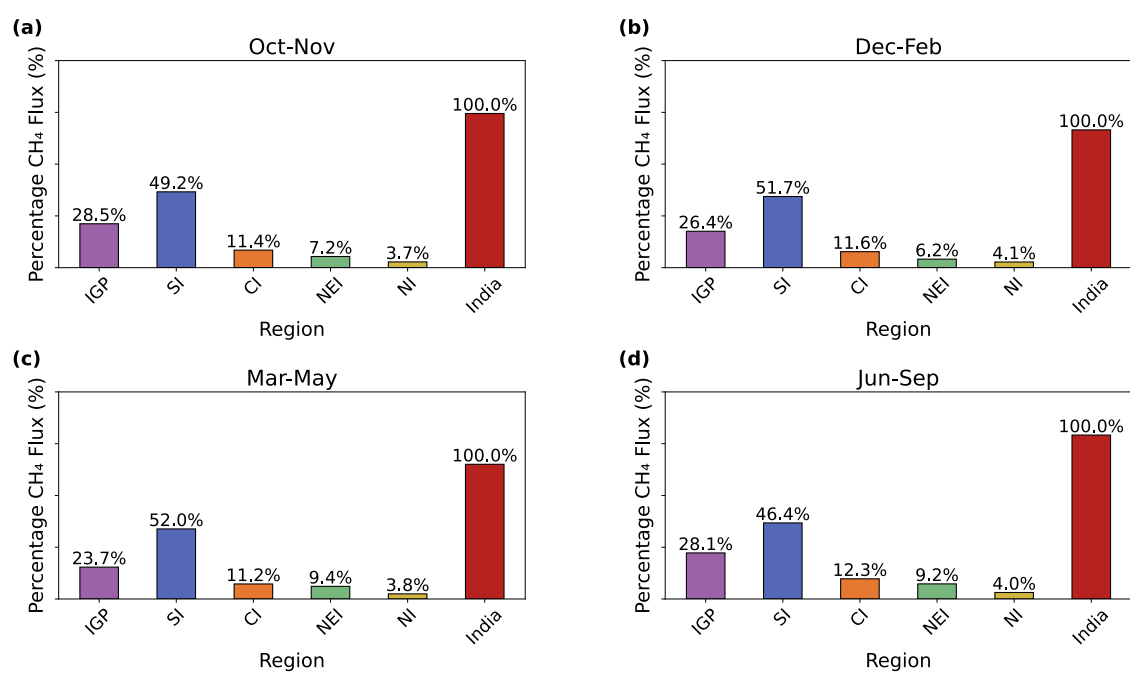

**Figure S2.** Percentage contribution of seasonal fluxes from bottom-up inventory data.

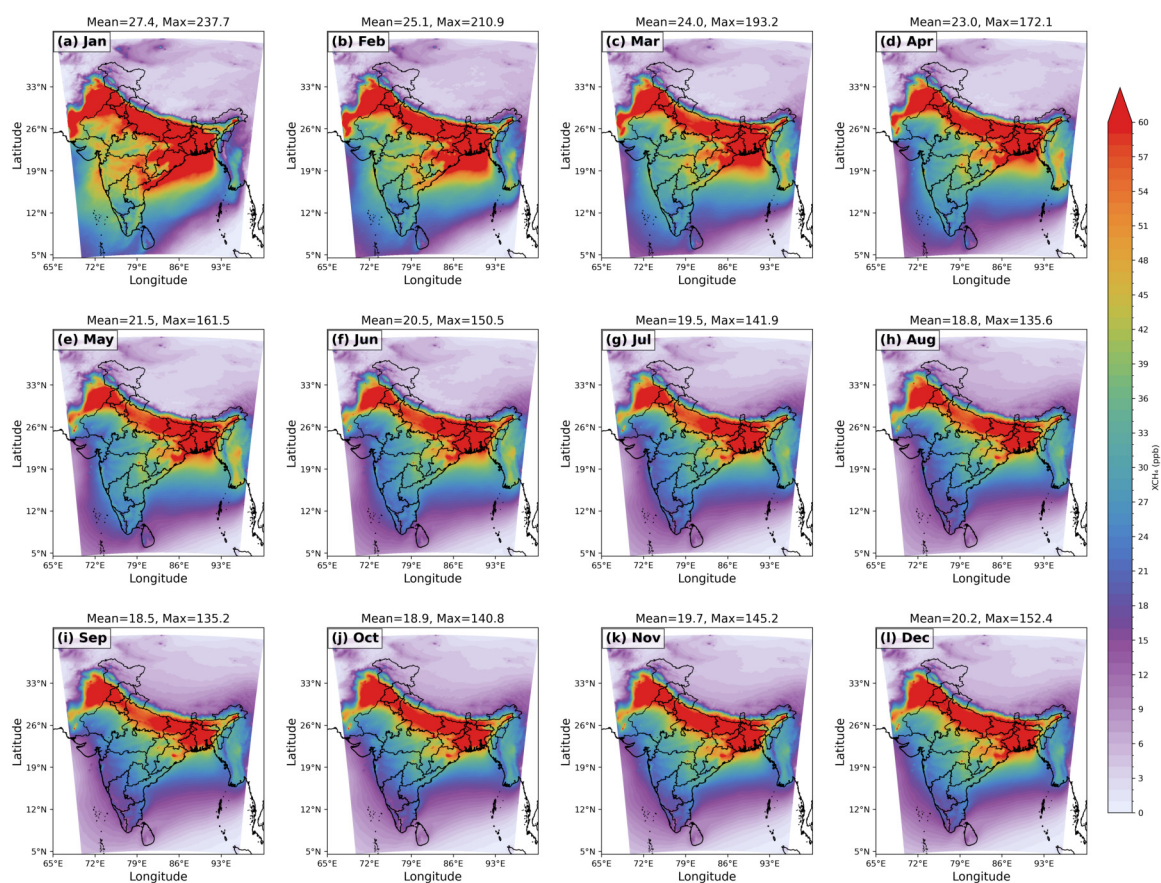

**Figure S3.** Spatial distribution of WRF anthropogenic mixing ratio enhancement (including biomass burning) for different months of 2019 (a)-(l).

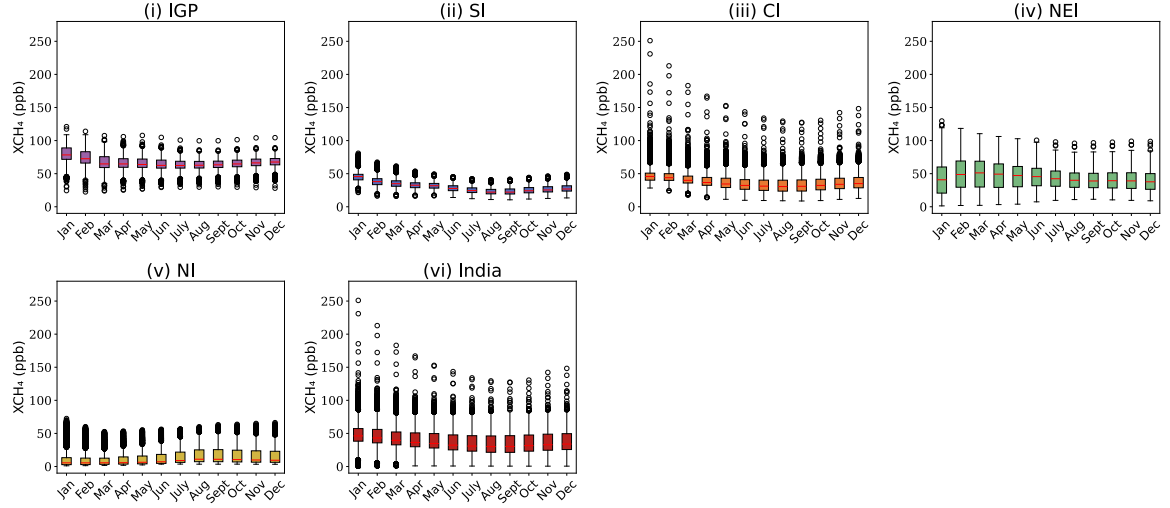

**Figure S4.** (a) Region-specific analysis of simulated mixing ratio enhancement for 2018, over (i) IGP (ii) SI (iii) CI (iv) NEI (v) NI and (vi) India.

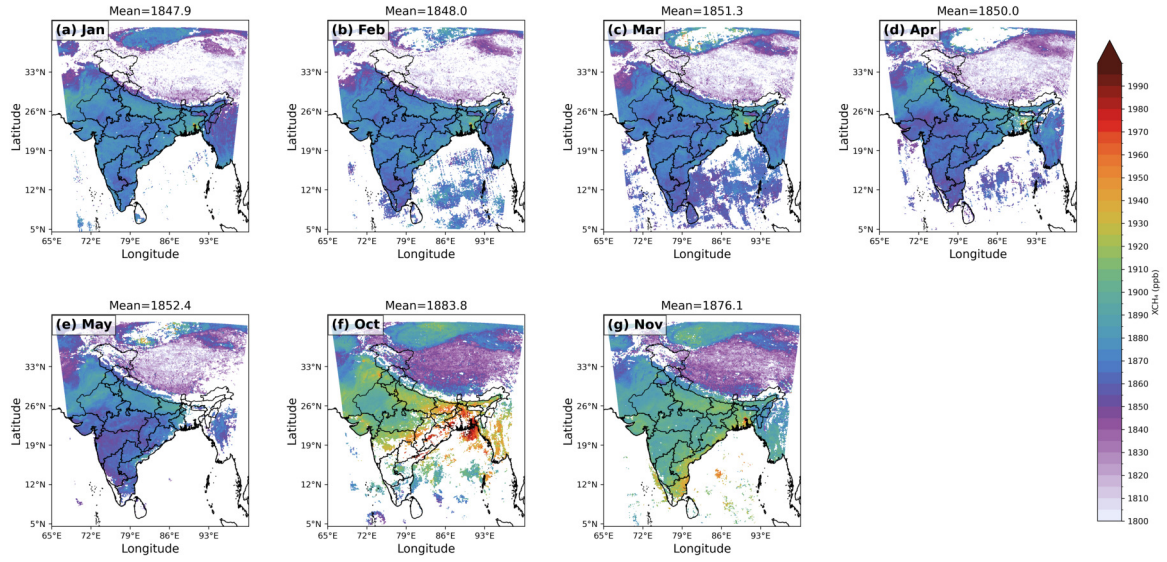

**Figure S5.** Spatial distribution of the TROPOMI Sentinel-5P retrievals of CH<sub>4</sub> for different months of 2019 (a-h). Some months are omitted due to filtering based on cloud pixels.

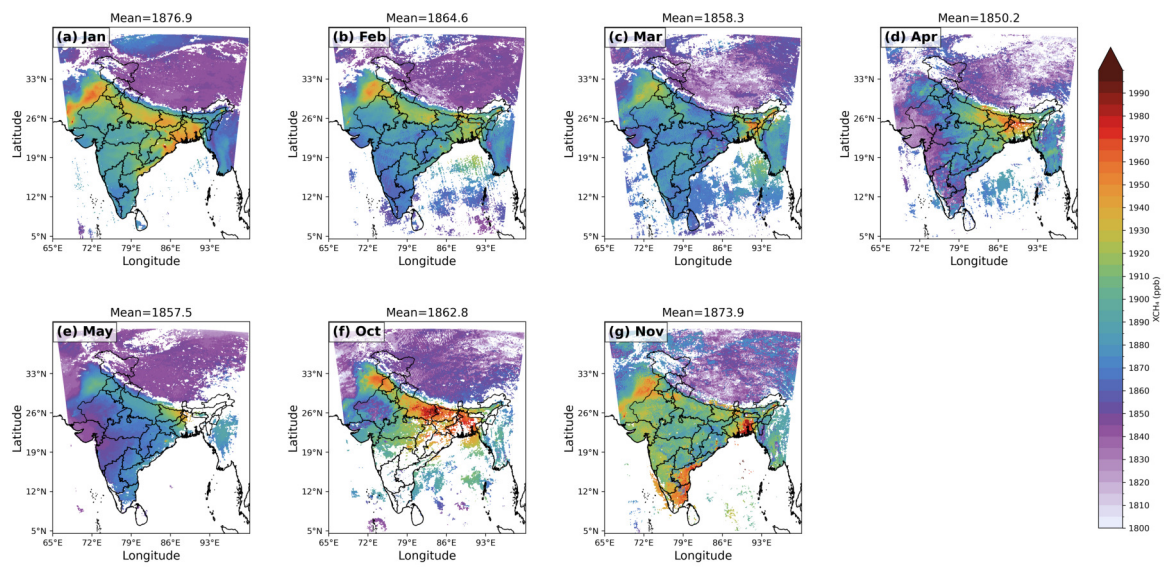

**Figure S6.** Spatial distribution of the WRF simulations for different months of 2019 (a-h). The months that are omitted in Fig. S5 are removed here also.

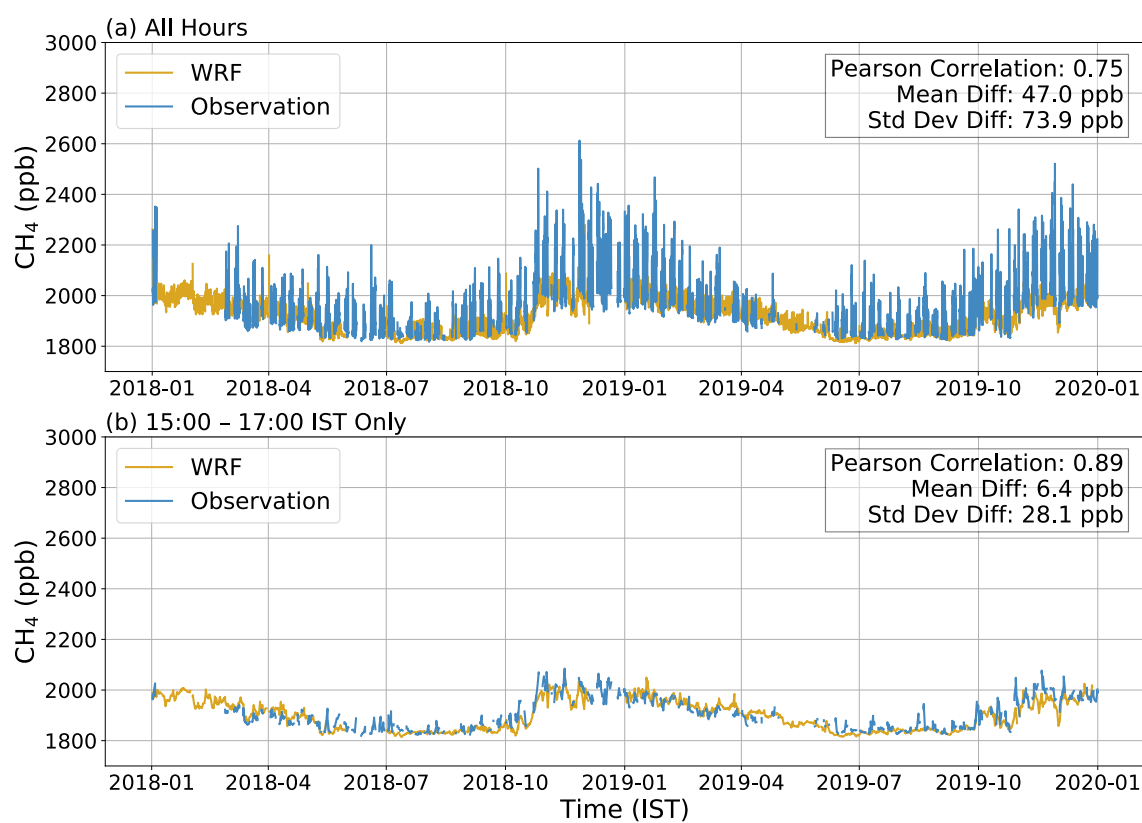

**Figure S7.** Comparison of the temporal distribution of observed and WRF-GHG simulated  $\text{CH}_4$  at Thumba (see the site location as denoted in Fig. 1) for (a) all hours and (b) 15:00 -17:00 IST only
